# Supplementary material for: MCPIP-1 Restricts Inflammation via Promoting Apoptosis of Neutrophils
Source: PubMed Central journal article supplement (PMC7952515; doi:10.3389/fimmu.2021.627922), 2021-02-26
Supplement: Presentation_1.pdf [file Presentation_1.pdf]

## Supplementary Material

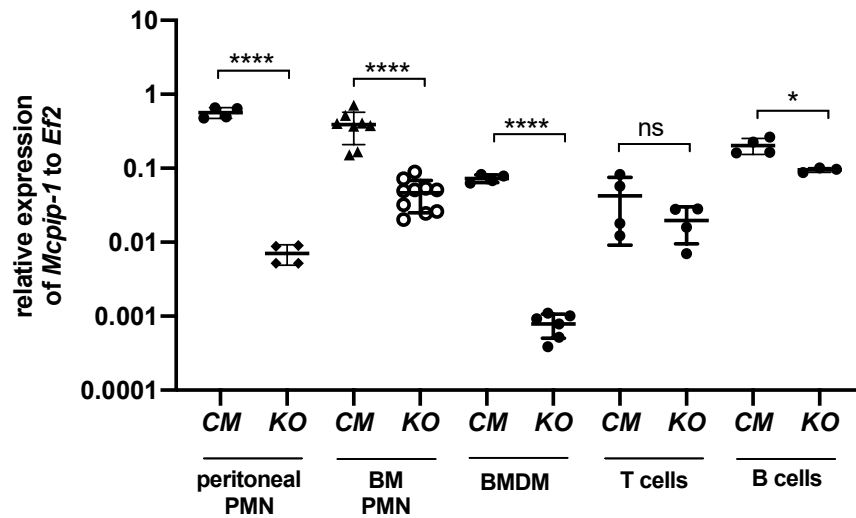

**Figure S1. Selective silencing of *Mcpip-1* gene in phagocytes of MCPIP1-Flox-M-Lys-CRE mice.**

The level of *Mcpip-1* expression in neutrophils isolated from peritoneum of thioglycolate i.p. injected *Control Mutant* (CM) and *Mcpip-1-KO* (KO) mice, PMN derived from bone marrow, bone marrow derived macrophages (BMDMs), T and B lymphocytes isolated from the murine spleen was determined using Real-time PCR; the mean  $\pm$  SEM; n=3-7

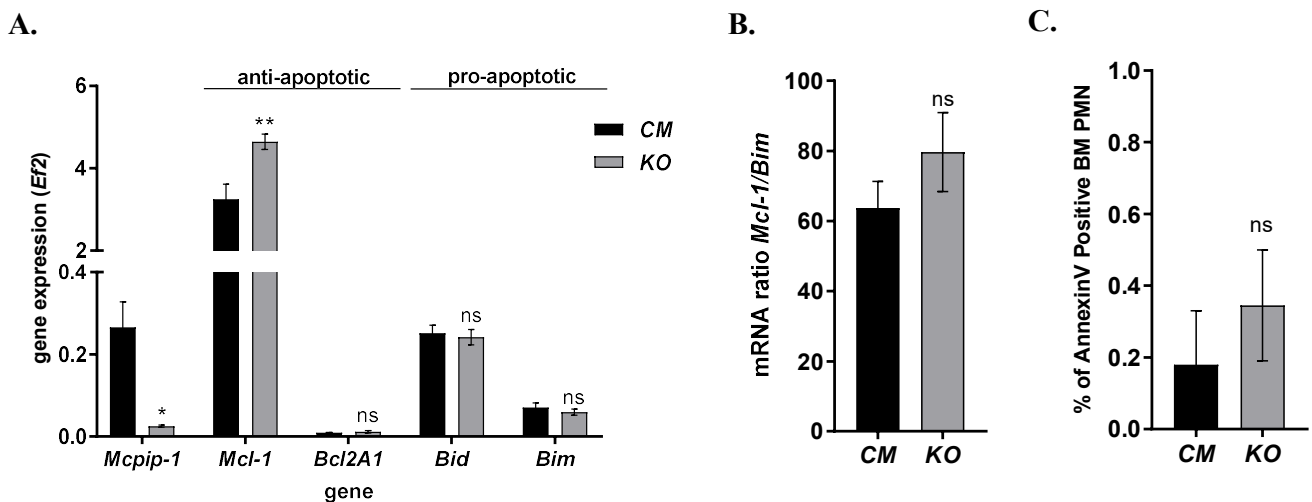

**Figure S2. MCPIP-1 regulates *Mcl-1* in bone marrow neutrophils.**

(A) Relative mean expression of apoptotic genes in murine neutrophils isolated from bone marrow of *Control Mutant* (CM) and *Mcpip-1-KO* (KO) mice. n=4 animals; (B) The graph represents a ratio between expression of *Mcl-1* and *Bim* mRNA in murine neutrophils isolated from bone marrow  $\pm$  SEM. (C) Neutrophils were double-stained with Annexin V and PI and subjected to FACS. A representative result of Annexin V positive cells is shown with the mean  $\pm$  SEM

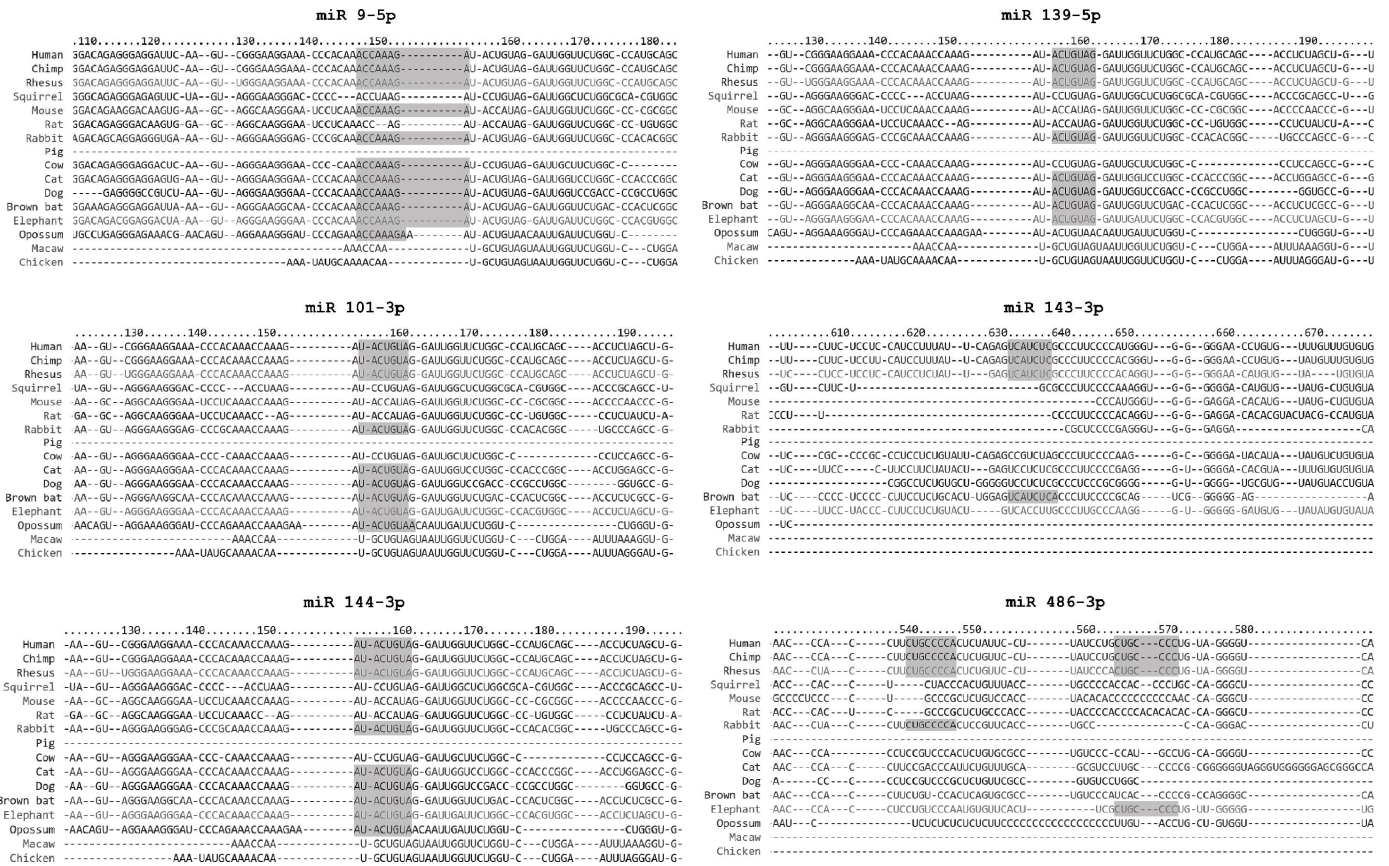

**Figure S3. Alignment of predicted miRNAs seeds regions that match the sequence of human *MCPIP-1* 3'UTRs and its orthologs.** Human - *Homo sapiens*; Chimpanzee - *Pan troglodytes*; Rhesus - *Macaca mulatta*; Squirrel - *Spermophilus tridecemlineatus*; Mouse - *Mus musculus*; Rat - *Rattus norvegicus*; Rabbit - *Oryctolagus cuniculus*; Pig - *Sus scrofa*; Cow - *Bos taurus*; Cat - *Felis catus*; Dog - *Canis lupus familiaris*; Brown bat - *Eptesicus fuscus*; Elephant - *Loxodonta africana*; Opossum - *Monodelphis domestica*; Scarlet macaw - *Ara macao*; Chicken - *Gallus gallus*.
